# Supplementary material for: The influence of water content in a proton-conducting ionic liquid on the double layer properties of the Pt/PIL interface
Source: Royal Society of Chemistry journal article supplement (doi:10.1039/c7cp04003b), 2017-01-01
Supplement: c7cp04003b1.pdf [file c7cp04003b1.pdf]

Supplementary information:

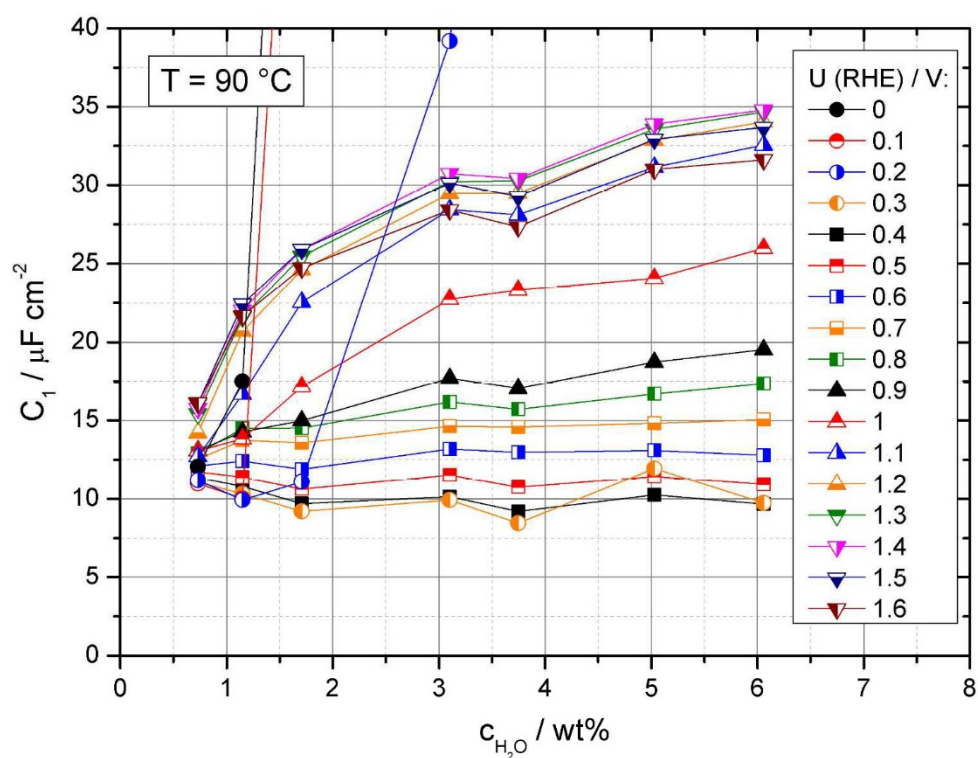

Fig. S1:  $C_1$  vs. water content, influence of potential, data taken from Fig. 4.

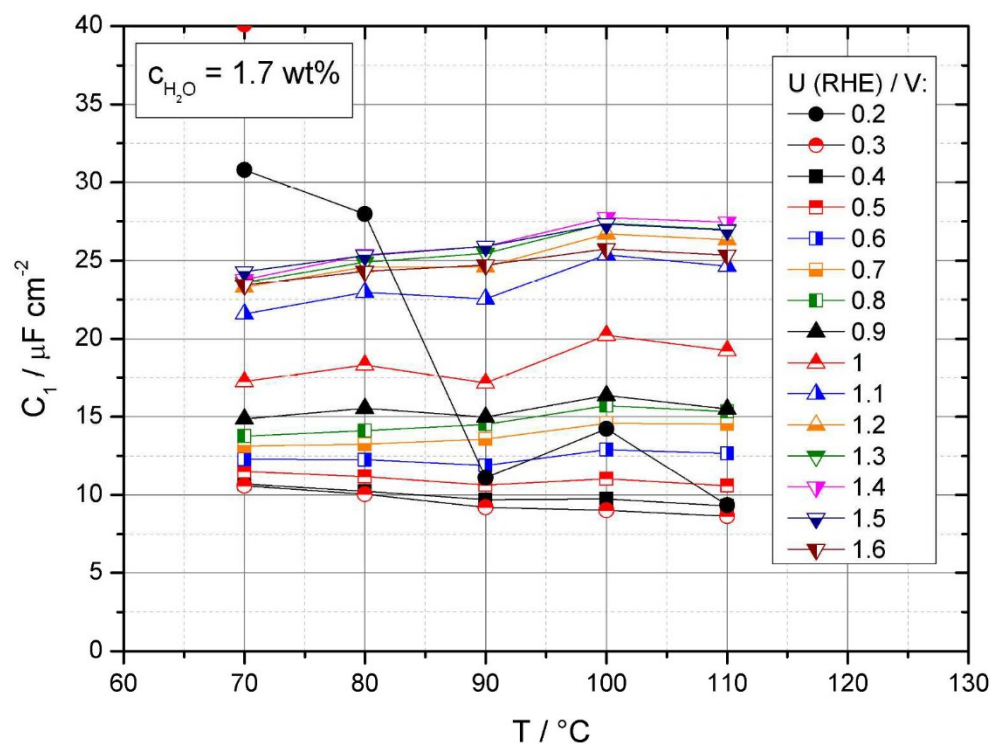

Fig. S2:  $C_1$  vs. temperature, influence of potential, data taken from Fig. 5.
